# Supplementary material for: One-Pot Biocatalytic Synthesis of rac-Syringaresinol from a Lignin-Derived Phenol
Source: PubMed Central journal article supplement (PMC10660655; doi:10.1021/acscatal.3c04399), 2023-10-31
Supplement: cs3c04399_si_001.pdf [file cs3c04399_si_001.pdf]

## *Supporting Information*

### **One-pot biocatalytic synthesis of *rac*-syringaresinol from a lignin-derived phenol**

Yiming Guo<sup>†</sup>, Laura Alvigini<sup>‡</sup>, Mohammad Saifuddin<sup>†</sup>, Ben Ashley, Milos Trajkovic<sup>†</sup>,  
Lur Alonso-Cotchico<sup>§</sup>, Andrea Mattevi<sup>\*,‡</sup>, and Marco W. Fraaije<sup>\*,†</sup>

<sup>†</sup> Molecular Enzymology Group, University of Groningen, Nijenborgh 4, 9747 AG  
Groningen, the Netherlands

<sup>‡</sup> Department of Biology and Biotechnology “Lazzaro Spallanzani”, University of  
Pavia, Via Ferrata 9, 27100 Pavia, Italy

<sup>§</sup> Zymvol Biomodeling S.L., Carrer Roc Boronat, 117, 08010, Barcelona, Spain

\*Corresponding Authors

E-mail for M.W.F.: [m.w.fraaije@rug.nl](mailto:m.w.fraaije@rug.nl)

E-mail for A.M.: [andrea.mattevi@unipv.it](mailto:andrea.mattevi@unipv.it)

Abbreviations: BPA, bisphenol A; EUGO, eugenol oxidase; HRP, horseradish peroxidase, DHSA, dihydrosinapyl alcohol, DHCA, dihydroconiferyl alcohol.

**Table S1.** Predicted active site mutations.

|          |                                                                                                                |
|----------|----------------------------------------------------------------------------------------------------------------|
| Rosetta  | V166A, V166T, Y168A, V276T, M282G, M282S, L381I, L381Q, I391A, I391V, G392A, S394A, S394V, A423L, Q425L, I427V |
| Rational | G165S, L381N, A423I, Q425E, I427A, H434D, H434L, L438D, L438E, I427G                                           |

**Table S2.** Data collection and refinement statistics for EUGO8X and EUGO10X.

|                                    | <i>EUGO8X</i>          | <i>EUGO10X</i>                                 |
|------------------------------------|------------------------|------------------------------------------------|
| Space group                        | P1                     | P 2 <sub>1</sub> 2 <sub>1</sub> 2 <sub>1</sub> |
| Unit cell axes (Å)                 | 113.56, 142.99, 154.60 | 57.65, 98.05, 177.34                           |
| Unit cell angles (°)               | 114.87, 97.00, 93.28   | 90, 90, 90                                     |
| Resolution (Å)                     | 2.3                    | 1.65                                           |
| PDB code                           | 8BAP                   | 8BAM                                           |
| R <sub>sym</sub> <sup>a,b</sup>    | 0.1592 (0.8421)        | 0.09249 (1.028)                                |
| CC <sub>1/2</sub>                  | 0.988 (0.547)          | 0.998 (0.674)                                  |
| Completeness <sup>b</sup> (%)      | 98.21 (97.67)          | 99.41 (95.48)                                  |
| Unique reflections                 | 379400                 | 120212                                         |
| Redundancy                         | 3.5 (3.6)              | 6.4 (6.3)                                      |
| I/σ <sup>b</sup>                   | 7.2 (1.6)              | 13.8 (1.7)                                     |
| N° of non-hydrogen atoms           |                        |                                                |
| protein/FAD                        | 68547/16x53            | 9917/2x53                                      |
| ligand                             | 16x15                  | 2x15                                           |
| water                              | 1287                   | 703                                            |
| Average B value (Å <sup>2</sup> )  | 34.51                  | 23.43                                          |
| R <sub>crys</sub> <sup>c</sup> (%) | 19.3                   | 17.2                                           |
| R <sub>free</sub> <sup>c</sup> (%) | 24.9                   | 20.6                                           |
| Rms bond length (Å)                | 0.009                  | 0.007                                          |
| Rms bond angles (°)                | 1.02                   | 0.94                                           |

<sup>a</sup>  $R_{sym} = \sum |I_i - \langle I \rangle| / \sum I_i$ , where  $I_i$  is the intensity of  $i^{\text{th}}$  observation and  $\langle I \rangle$  is the mean intensity of the reflection.

<sup>b</sup> Values in parentheses are for reflections in the highest resolution shell.

<sup>c</sup>  $R_{cryst} = \sum |F_{obs} - F_{calc}| / \sum |F_{obs}|$  where  $F_{obs}$  and  $F_{calc}$  are the observed and calculated structure factor amplitudes, respectively.  $R_{cryst}$  and  $R_{free}$  were calculated using the working and test sets, respectively.

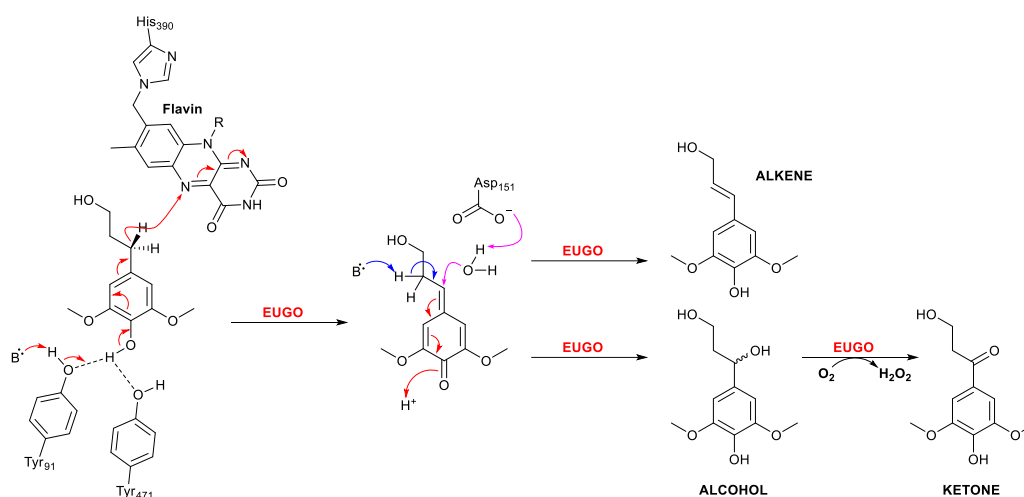

**Figure S1.** Mechanistic proposal for the oxidation of dihydrosinapyl alcohol by EUGO. Flavin acts as a hydride acceptor for dihydrosinapyl alcohol, generating a reactive quinone methide intermediate. The intermediate is quenched either by deprotonation of the adjacent carbon to form an alkene (blue arrows), or base-catalysed hydroxylation by a water molecule (pink arrows).

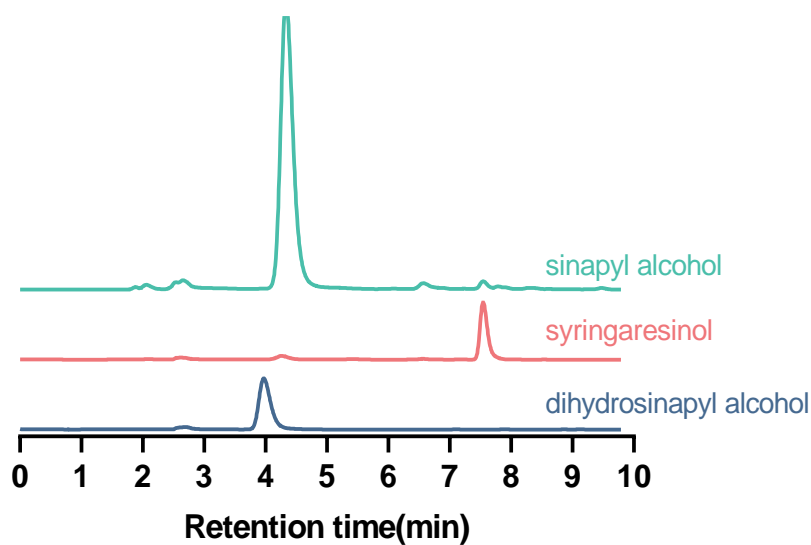

**Figure S2.** HPLC analysis of relevant compounds. Dihydrosinapyl alcohol, sinapyl alcohol, and syringaresinol are shown in blue, green and red, respectively.

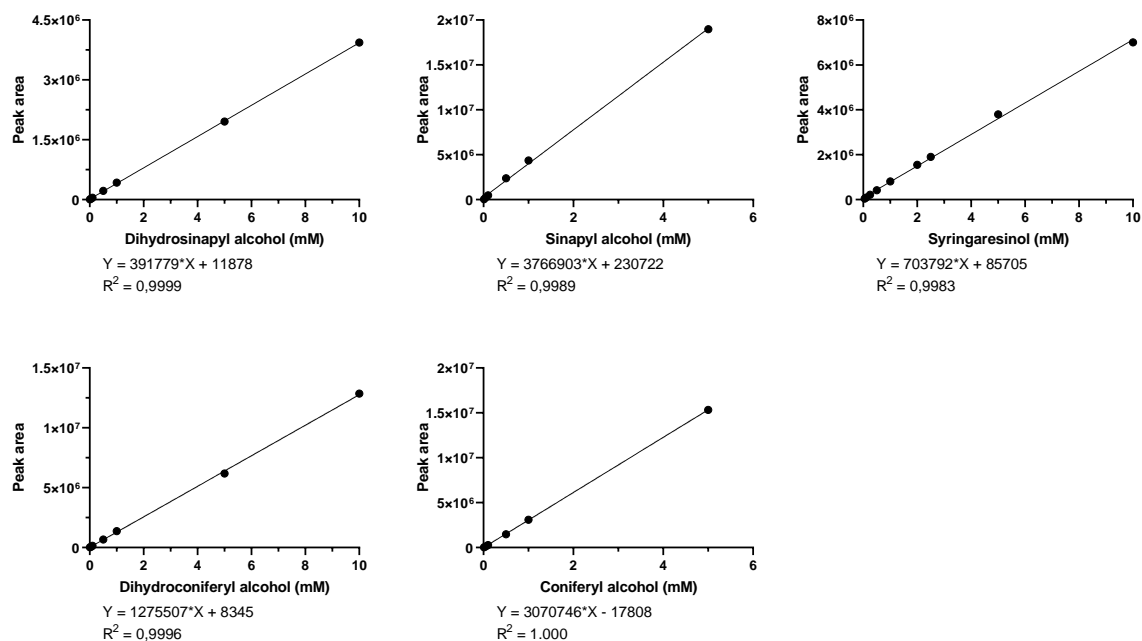

**Figure S3.** HPLC calibration curves of dihydroconiferyl alcohol, coniferyl alcohol, dihydrosinapyl alcohol, sinapyl alcohol and syringaresinol.

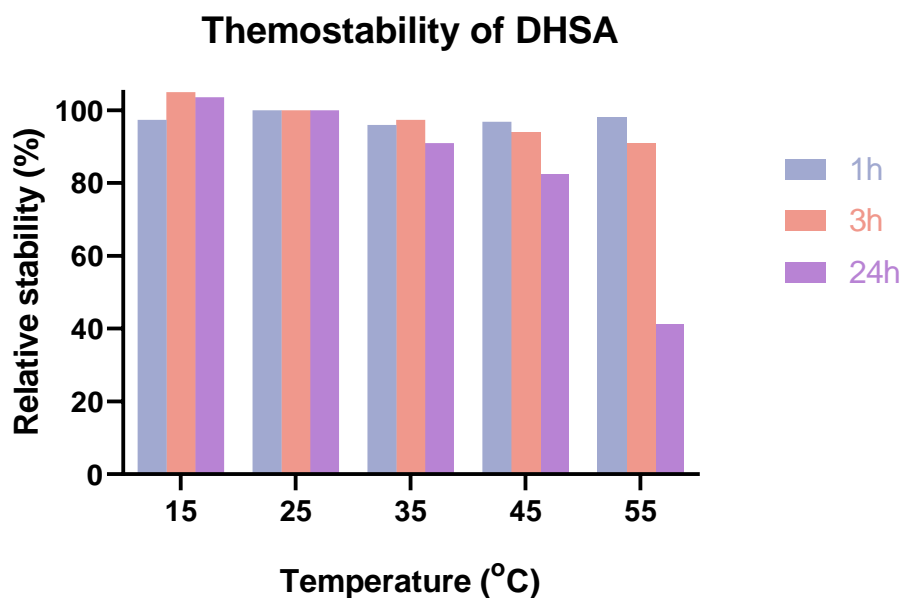

**Figure S4.** Temperature effect on stability of dihydrosinapyl alcohol. Dihydroconiferyl alcohol (5 mM) was incubated in KPi buffer (50 mM, pH 7.5) containing DMSO (10% v/v) at the indicated temperatures, and the mixture was assayed by HPLC.

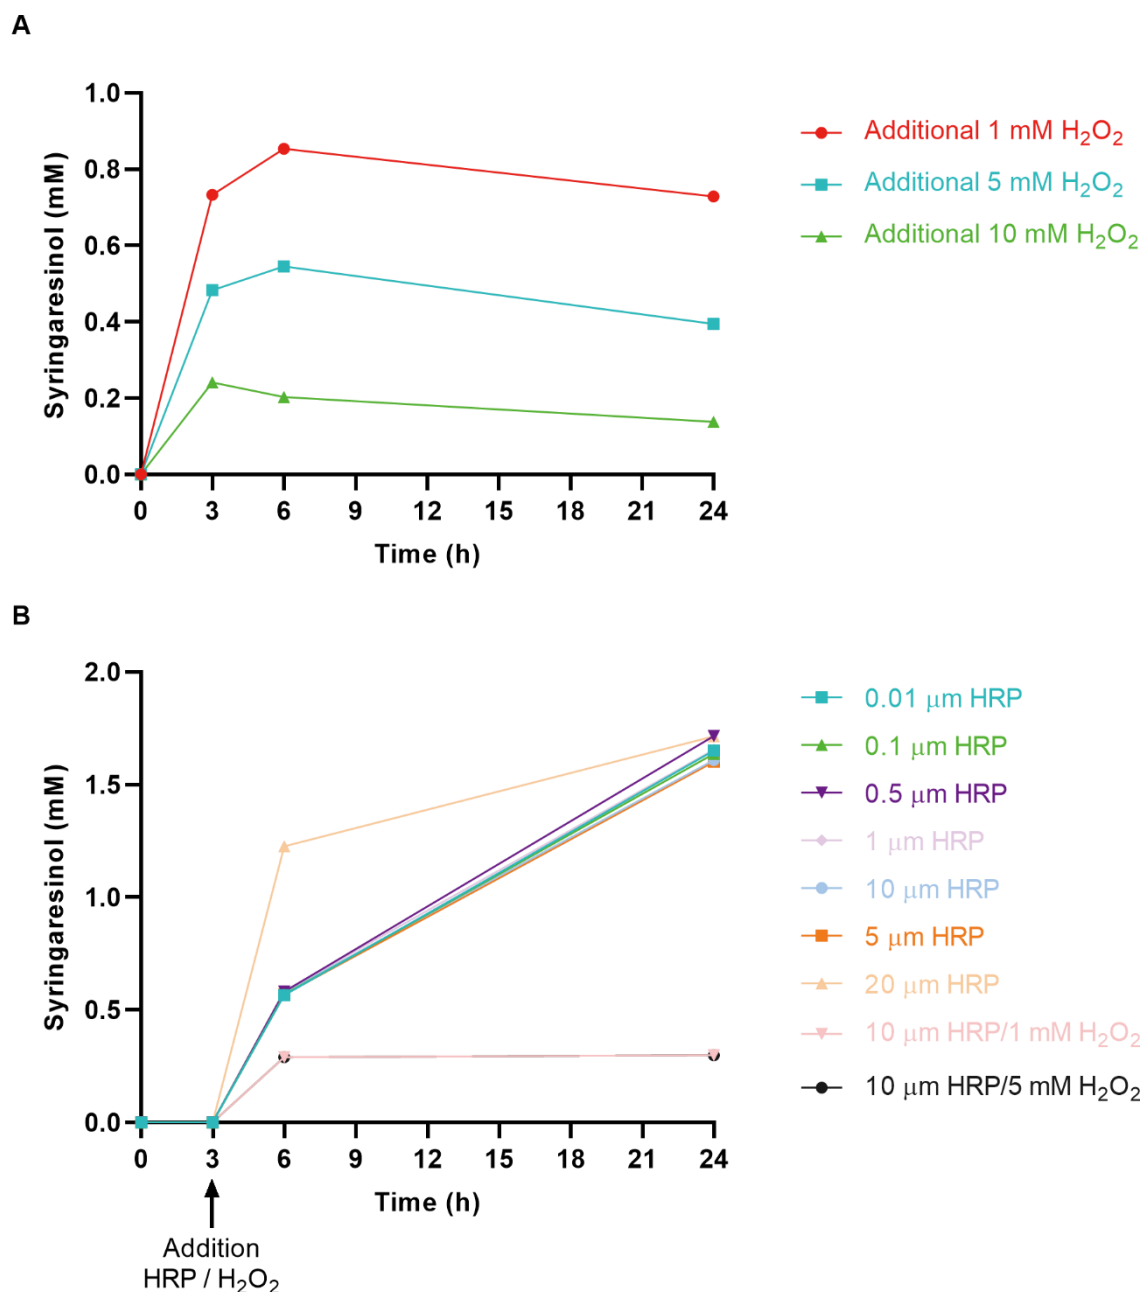

**Figure S5.** Optimization of the one-pot conversion of dihydrosinapyl alcohol to syringaresinol by an oxidase-peroxidase cascade reaction. A) Effect of additional hydrogen peroxide on the formation of syringaresinol from dihydrosinapyl alcohol by an oxidase-HRP cascade reaction. Using dihydrosinapyl alcohol (5 mM), oxidase (10  $\mu$ M), and HRP (10  $\mu$ M), the reactions with a gradient addition of hydrogen peroxide were performed in KPi buffer (50 mM, pH 7.5) at 37  $^{\circ}$ C, 150 rpm. B) Effects of delayed addition of HRP and hydrogen peroxide on the formation of syringaresinol by an oxidase-HRP cascade reaction. The reactions were initialized with dihydrosinapyl alcohol (5 mM) and oxidase (10  $\mu$ M), and then HRP with a gradient concentration and HRP (10  $\mu$ M) combined with hydrogen peroxide at 5 mM and 10 mM were added after 3 hours.

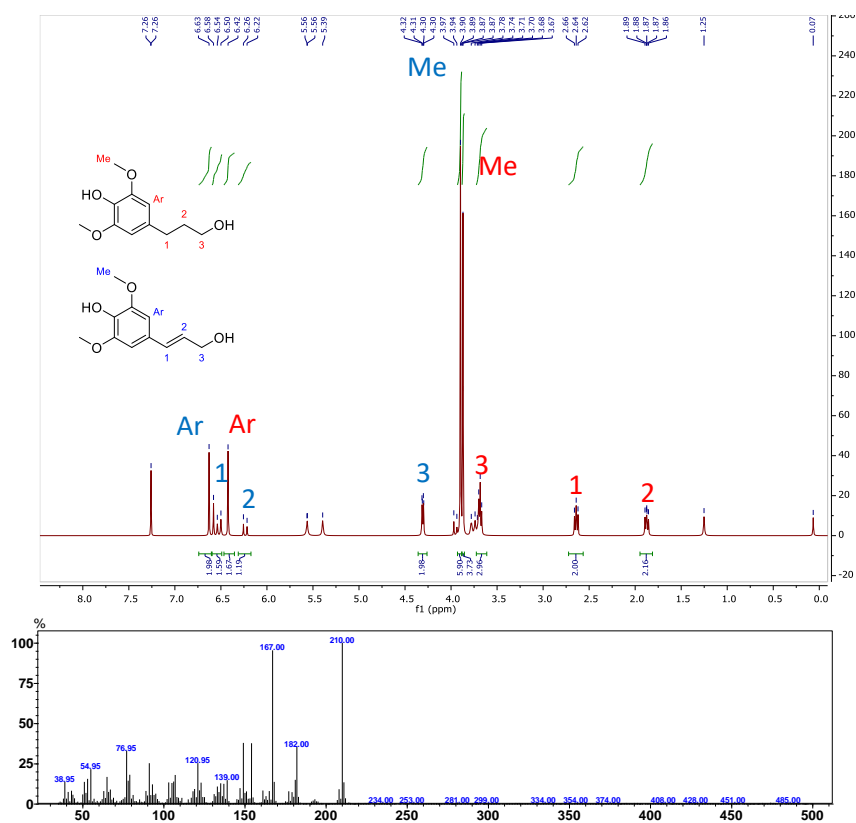

**Figure S6.** Analysis of product mixture isolated from 20 mg conversion of dihydrosinapyl alcohol using EUGO10X. A)  $^1\text{H}$  NMR spectrum of product mixture of sinapyl alcohol and dihydrosinapyl alcohol. B) GC-EI-MS mass spectrum of the sinapyl alcohol reaction product. The NMR peaks formed which are distinct from those of dihydrosinapyl alcohol align well with literature values for sinapyl alcohol.<sup>1</sup>

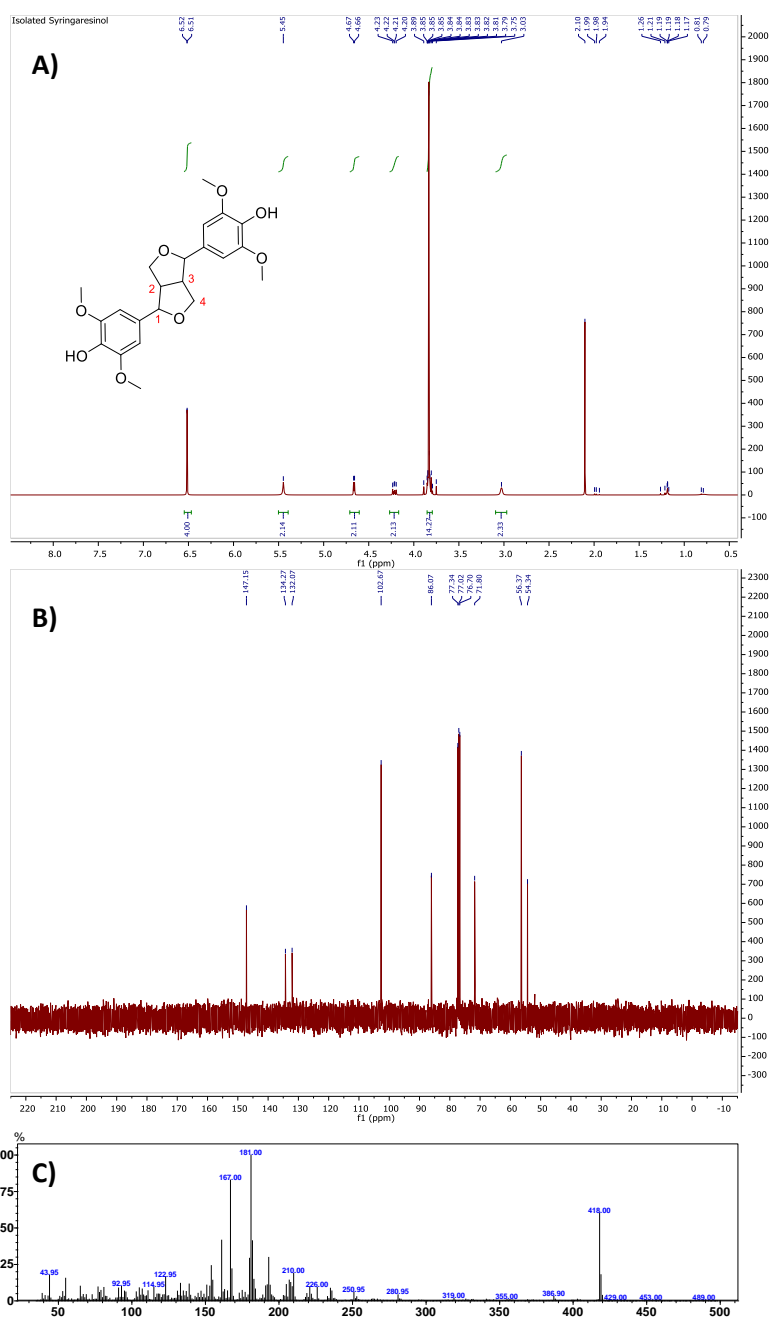

**Figure S7.** Analytical data of syringaresinol product isolated from 20 mg conversion of dihydrosinapyl alcohol using EUGO10X and HRP. A) <sup>1</sup>H NMR spectrum. B) <sup>13</sup>C NMR spectrum. C) GC-EI-MS mass spectrum of the syringaresinol product.

**<sup>1</sup>H NMR** (400 MHz, CDCl<sub>3</sub>) δ<sub>H</sub> 6.51 (s, 4H, aromatic protons), 5.45 (s, 2H, -OH), 4.67 (d, J = 3.9 Hz, 2H, H-1), 4.22 (dd, 2H, J = 7.4, 6.5 Hz, H-4), 3.86 – 3.80 (m, 14H, H-4 & -OMe), 3.08 – 3.00 (m, 2H, H-2).

**<sup>13</sup>C NMR** (101 MHz, CDCl<sub>3</sub>) δ<sub>C</sub> 147.2, 134.3, 132.1, 102.7, 86.1, 71.8, 56.4, 54.3.

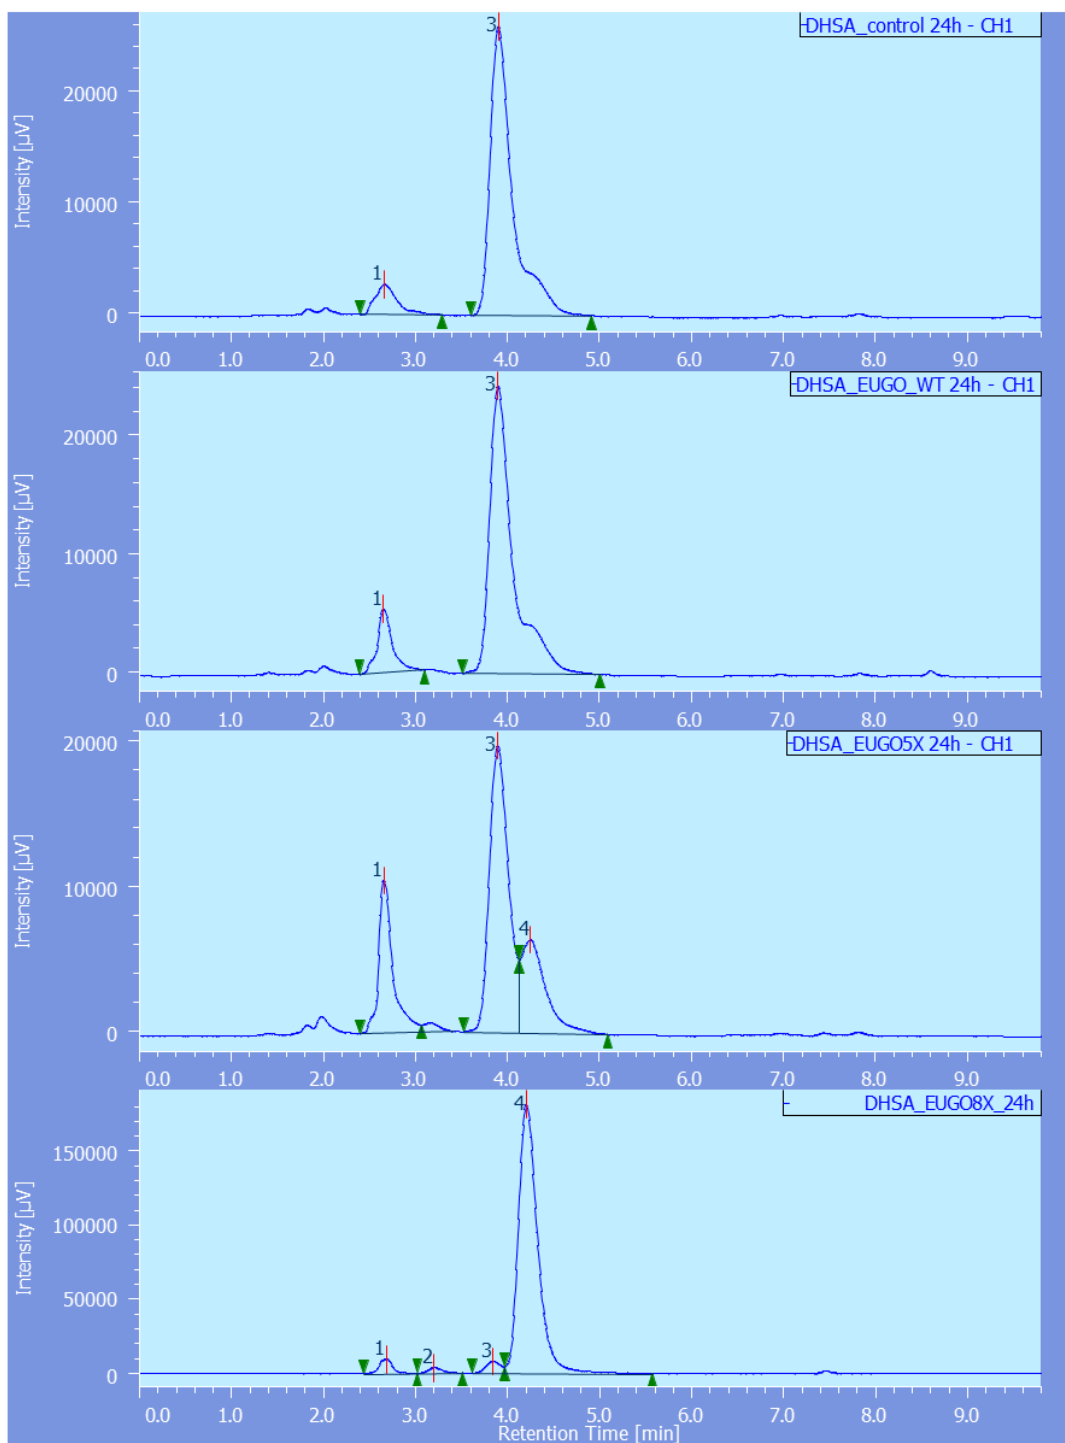

**Figure S8.** HPLC analysis of the conversion of dihydrosinapyl alcohol by EUGO variants at different stages of engineering. In all chromatograms, peaks 1, 2, 3 and 4 hydroxylated DHSA (Rt = 2.7 min), DHSA ketone (Rt = 3.2 min), DHSA (Rt = 4.0 min) and sinapyl alcohol (Rt = 4.3 min), respectively. The first chromatogram shows the elution of the reference substrate dihydrosinapyl alcohol. The chromatograms of the conversions show depletion of dihydrosinapyl alcohol to form sinapyl alcohol and by-products.



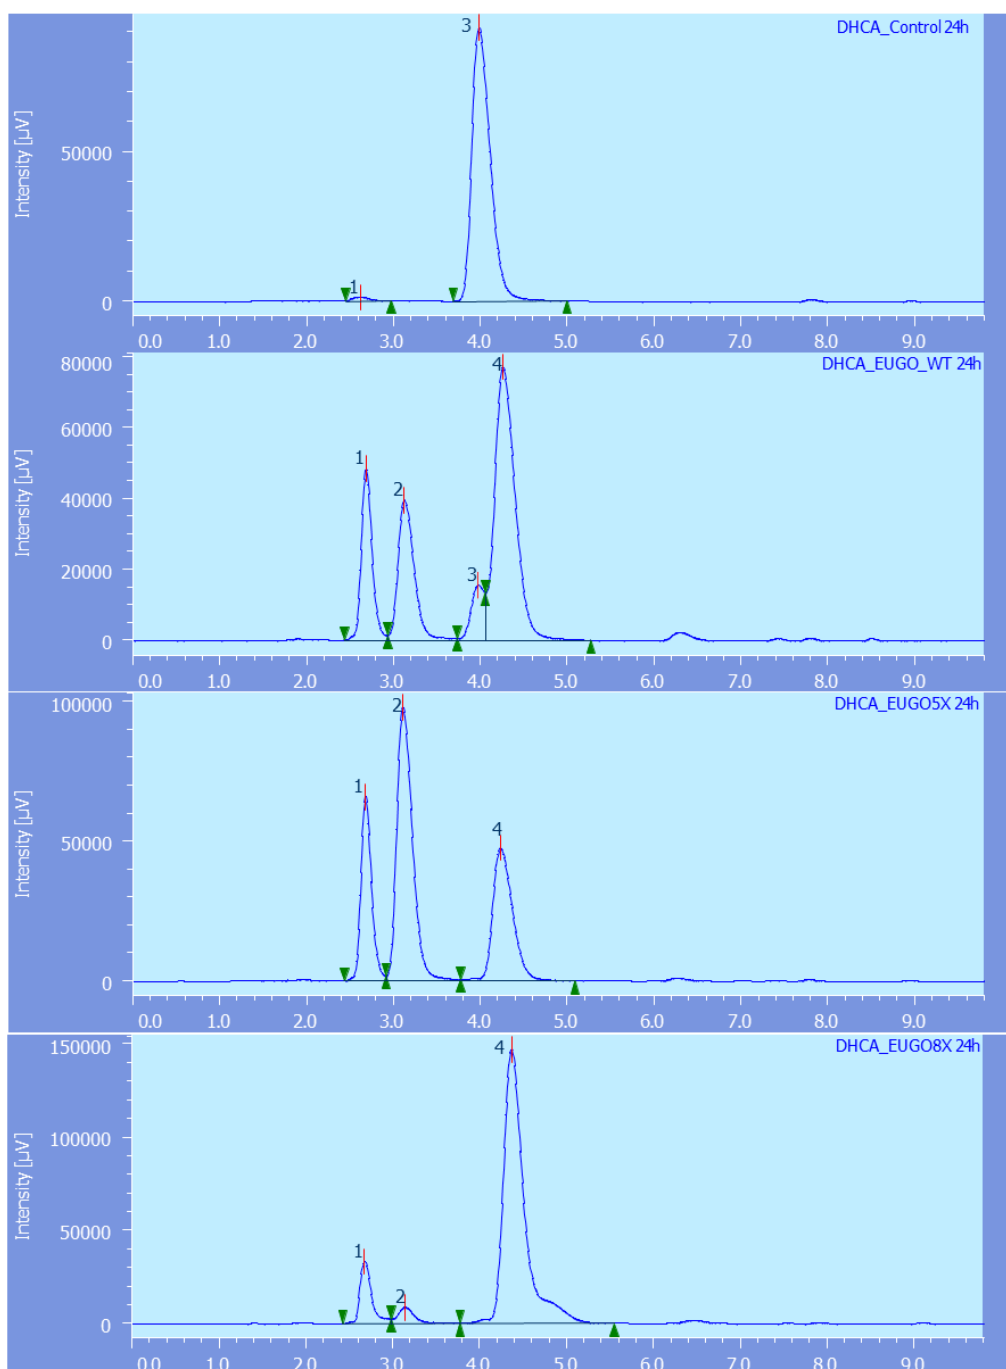

**Figure S9.** HPLC analysis of the conversion of dihydroconiferyl alcohol by EUGO variants at different stages of engineering. In all chromatograms, peak 1, 2, 3, 4 represent hydroxylated DHCA (Rt = 2.7 min), DHCA ketone (Rt = 3.2 min), DHCA (Rt = 4.0 min) and coniferyl alcohol (Rt = 4.3 min), respectively. The first chromatogram shows the elution of the reference substrate dihydroconiferyl alcohol. The chromatograms of the conversions show depletion of dihydroconiferyl alcohol to form coniferyl alcohol and by-products.

## Protein Sequences

### EUGO

MTRTLPPGVSDERFDAALQFRDVGDKWVLSTADELEAFRDYPVGAEEANLPSAVVSP  
ESTEQQDIVRIANEYGIPLSPVSTGKNNGYGGAAPRLSGSVIVKTGERMNRILEVNEKY  
GYALLEPGVITYFDLYEYLQSHDSGLMLDPCDLGWGSVVGNTLDRGVGYTPYGDHFMWQTG  
LEVVLPPQGEVMRTGMGALPGSDAWQLFPYGF GPFDPGMFTQSNLGIIVTKMGIALMQRPPA  
SQSFLITFDKEEDLEQIVDIMLPLRINMAPLQNVVLRNIFMDAAAVSKRTEWFDGDGPM  
PAEAIERMKKDLDLGFWNFYGTLYGPPPLIEMYYGMIKEAFGKI PGARFFTHEERDDRGG  
HVLQDRHKINNGI PSLDELQLLDWVPNGGHI GFSPVSAPDGREAMKQFEMVRNRANEYNK  
DYAAQFI IGLREMHVCLFIYDTAI PEAREEILQMTKVLVREAAEAGYGEYRTHNALMDD  
VMATFNWGDGALLKFHEKIKDALDPNGIIAPGKSGIWSQRFRGQNL

### EUGO5X

MTRTLPPGVSDERFDAALQFRDVGDKWVLSTADELEAFRDYPVGAEEANLPSAVVSP  
ESTEQQDIVRIANEYGIPLHPVSTGKNNGYGGAAPRLSGSVIVKTGERMNRILEVNEKY  
GYALLEPGVITYFDLYEYLQSHDSGLMLDPCDLGWGSVVGNTLDRGVGYTPYGDHFMWQTG  
LEVVLPPQGEVMRTGMGALPGSDAWQLFPYGF GPFDPGMFTQSNLGIIVTKMGIALMQRPPA  
SQSFLITFDKEEDLEQIVDIMLPLRINMAPLQNVVLRNIFMDAAAVSKRTEWFDGDGPM  
PAEAIERMKKDLDLGFWNFYGTLYGPPPLIEMYYGMIKEAFGKI PGARFFTHEERDDRGG  
HVLQDRHKINNGI PSLDELQLLDWVPNGGHI GFSPVSAPDGREAMKQFEMVRNRANEYNK  
DYMAQFI IGLREMYHVCLFIYDTADPEAREEILQMTKVLVREAAEAGYGEYRTHNALMDD  
VMATFNWGDGALLKFHEKIKDALDPNGIIAPGKSGIWPQRFRGQNL

### EUGO8X

MTRTLPPGVSDERFDAALQFRDVGDKWVLSTADELEAFRDYPVGAEEANLPSAVVSP  
ESTEQQDIVRIANEYGIPLHPVSTGKNNGYGGAAPRLSGSVIVKTGERMNRILEVNEKY  
GYALLEPGVITYFDLYEYLQSHDSGLMLDPCDLGWGSVVGNTLDRGVGYTPYGDHFMWQTG  
LEVVLPPQGEVMRTGMGALPGSDAWQLFPYGF GPFDPGMFTQSNLGIIVTKMGIALMQRPPA  
SQSFLITFDKEEDLEQIVDIMLPLRINMAPLQNVVLRNIFMDAAAVSKRTEWFDGDGPM  
PAEAIERMKKDLDLGFWNFYGTLYGPPPLIEMYYGMIKEAFGKI PGARFFTHEERDDRGG  
HVLQDRHKINNGI PSLDELQQLDWVPNGGHI GFVPSAPDGREAMKQFEMVRNRANEYNK  
DYMAQFVIGLREMYHVCLFIYDTADPEAREEILQMTKVLVREAAEAGYGEYRTHNALMDD  
VMATFNWGDGALLKFHEKIKDALDPNGIIAPGKSGIWPQRFRGQNL

### EUGO10X

MTRTLPPGVSDERFDAALQFRDVGDKWVLSTADELEAFRDYPVGAEEANLPSAVVSP  
ESTEQQDIVRIANEYGIPLHPVSTGKNNGYGGAAPRLSGSVIVKTGERMNRILEVNEKY  
GYALLEPGVITYFDLYEYLQSHDSGLMLDPCPELGWGSVVGNTLDRGVGYTPYGDHFMWQTG  
LEVVLPPQGEVMRTGMGALPGSDAWQLFPYGF GPFDPGMFTQSNLGIIVTKMGIALMQRPPA  
SQSFLITFDKEEDLEQIVDIMLPLRINMAPLQNVVLRNIFMDAAAVSKRTEWFDGDGPM  
PAEAIERMKKDLDLGFWNFYGTLYGPPPLIEMYYGMIKEAFGKI PGARFFTHEERDDRGG  
HVLQDRHKINNGI PSLDELQQLDWVPNGGHI GFVPSAPDGREAMKQFEMVRNRANEYNK  
DYMASFVIGLREMYHVCLFIYDTADPEAREEILQMTKVLVREAAEAGYGEYRTHNALMDD  
VMATFNWGDGALLKFHEKIKDALDPNGIIAPGKSGIWPQRFRGQNL

## BIBLIOGRAPHY

1. Zhao, C.; Hu, Z.; Shi, L.; Wang, C.; Yue, F.; Li, S.; Zhang, H.; Lu, F., Profiling of the formation of lignin-derived monomers and dimers from Eucalyptus alkali lignin. *Green Chem.* **2020**, *22* (21), 7366-7375.
